# Supplementary material for: Suppression of Poly(rC)-Binding Protein 4 (PCBP4) reduced cisplatin resistance in human maxillary cancer cells
Source: PubMed Central journal article supplement (PMC4508830; doi:10.1038/srep12360), 2015-07-21
Supplement: srep12360-s1.pdf [file srep12360-s1.pdf]

## Supplementary information

### **Suppression of Poly(rC)-Binding Protein 4 (PCBP4) reduced cisplatin resistance in human maxillary cancer cells**

Yumi Ito<sup>1</sup>, Norihiko Narita<sup>1\*</sup>, Nozomi Nomi<sup>2</sup>, Chizuru Sugimoto<sup>1</sup>, Tetsuji Takabayashi<sup>1</sup>,  
Takechiyo Yamada<sup>1</sup>, Kazuhiro Karaya<sup>3</sup>, Hideki Matsumoto<sup>4</sup>, and Shigeharu Fujieda<sup>1</sup>

<sup>1</sup>Department of Otorhinolaryngology Head and Neck Surgery, Faculty of Medical Sciences, University of Fukui, 23 Shimoaizuki, Matsuoka, Eiheiji, Fukui, 910-1193, Japan

<sup>2</sup>Department of Otorhinolaryngology, Faculty of Medical Sciences, University of Oita

<sup>3</sup>Division of Bioresearch, Life Science Research Laboratory, Faculty of Medical Sciences, University of Fukui, 23 Shimoaizuki, Matsuoka, Eiheiji, Fukui, 910-1193, Japan

<sup>4</sup>Division of Oncology, Biomedical Imaging Research Center, Faculty of Medical Sciences, University of Fukui, 23 Shimoaizuki, Matsuoka, Eiheiji, Fukui, 910-1193, Japan

335F/885R

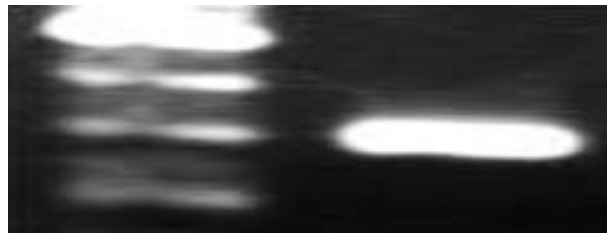

← MCG10, MCG10a  
←  $\alpha$ CP-4

769F/1222R

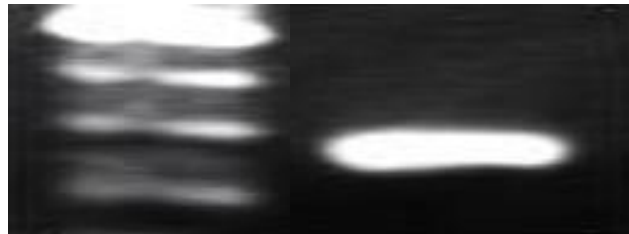

← MCG10  
←  $\alpha$ CP-4, MCG10a

### Supplementary Figure S1

The expression of only  $\alpha$ CP-4 was confirmed in IMC-3CR cells. The arrows show the positions of expected PCR products of MCG10, MCG10a, and  $\alpha$ CP-4.

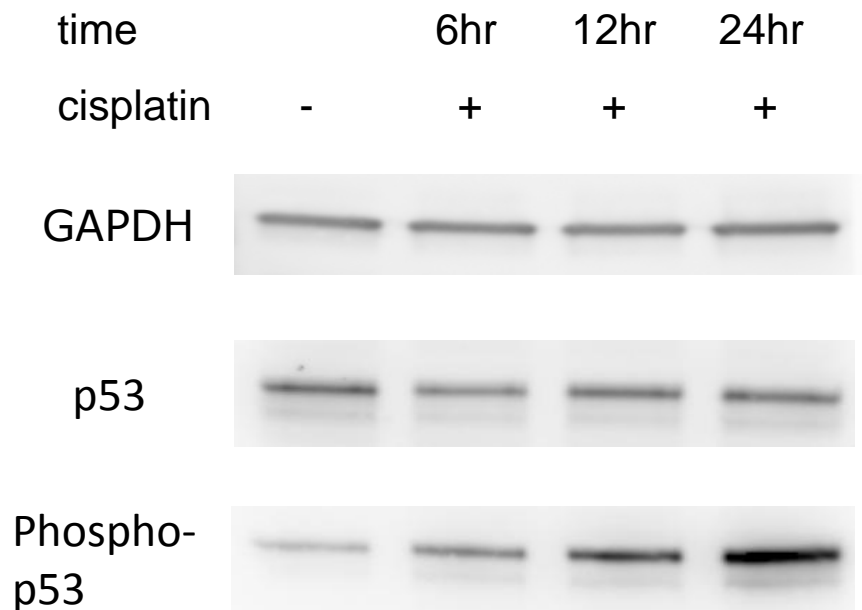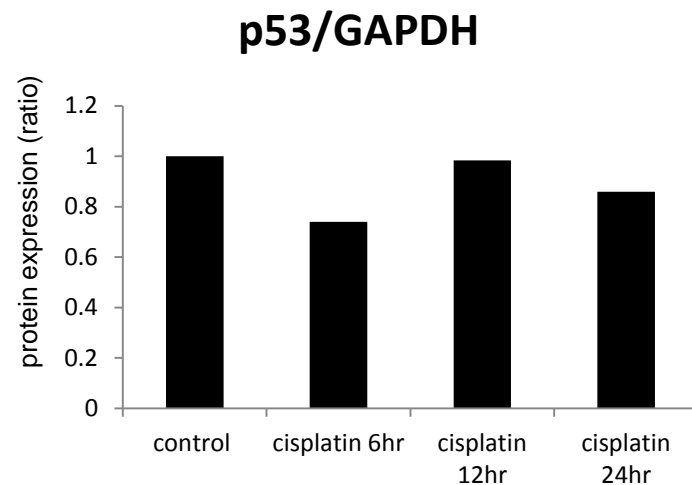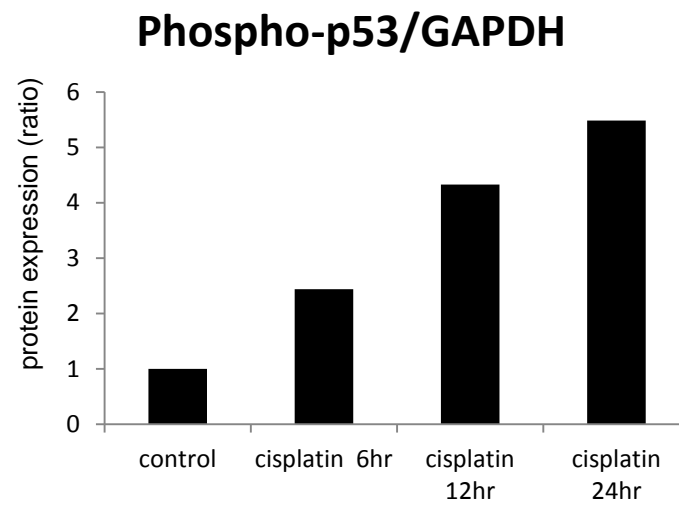

## Supplementary Figure S2

Expression of p53 and phosphorylated p53 in IMC-3 CR cells were analyzed by Western blotting (left panel). The density of the Western blotting was quantified (right panel).

Figure 2

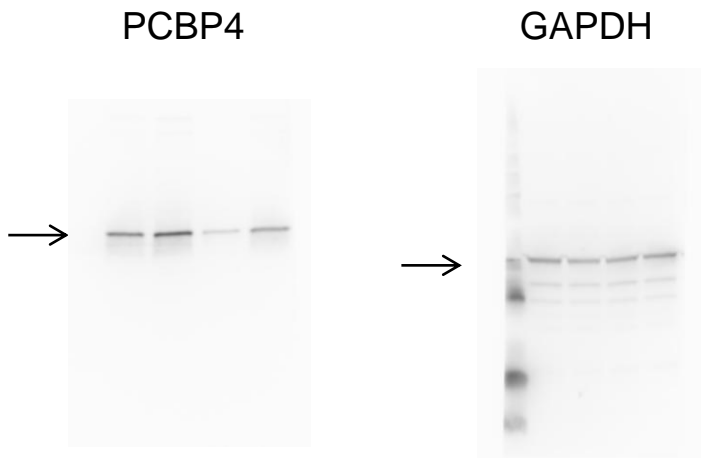

Figure 4

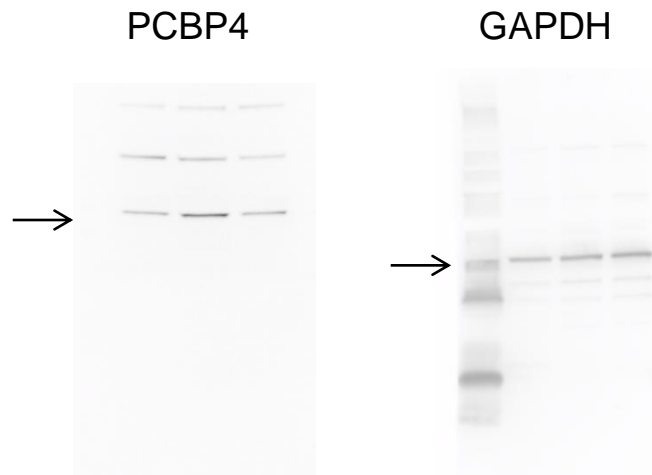

Figure 5

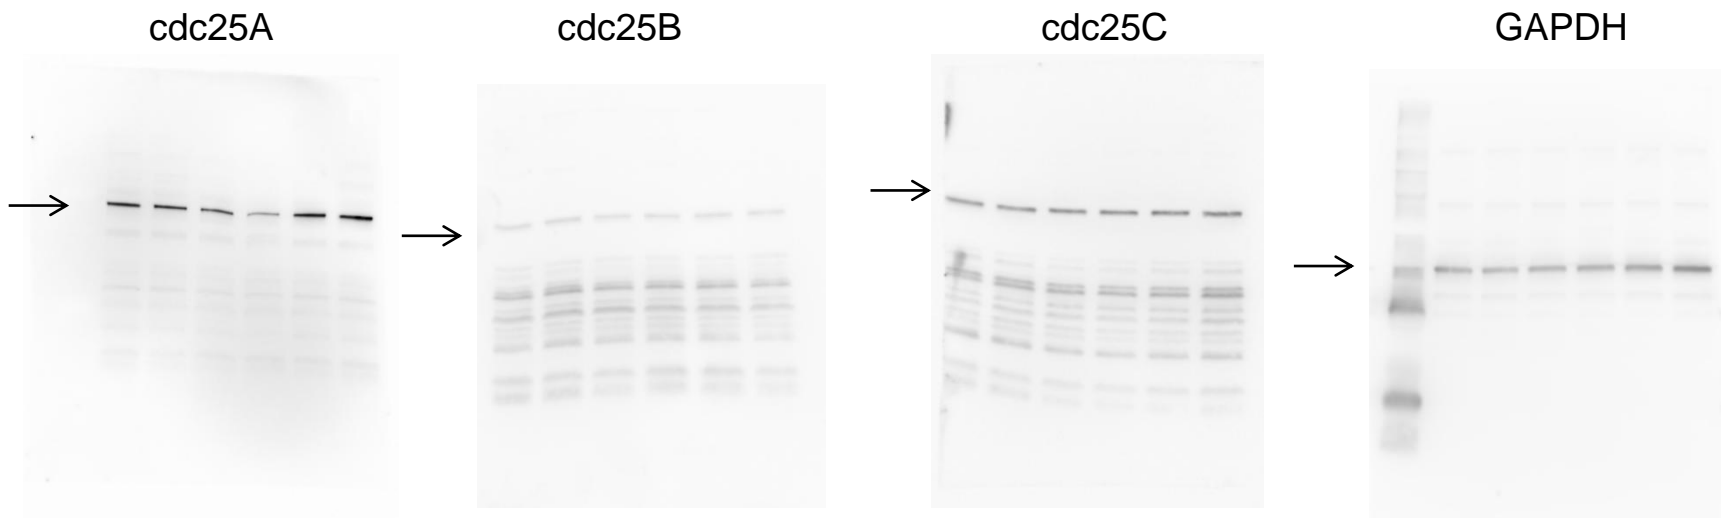

Supplementary Figure S3

Original scans for all of the Western blot. The arrows show the positions of the proteins.

FigureS2

GAPDH

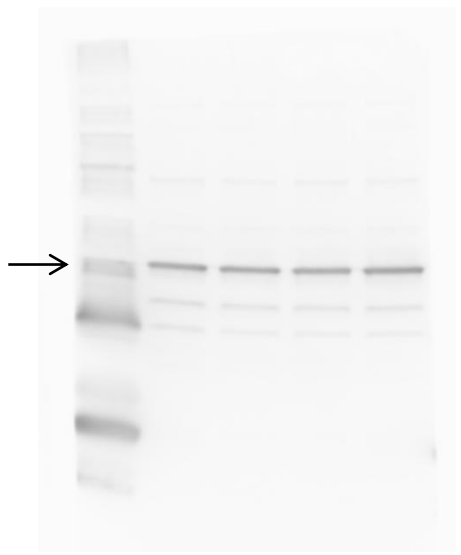

p53

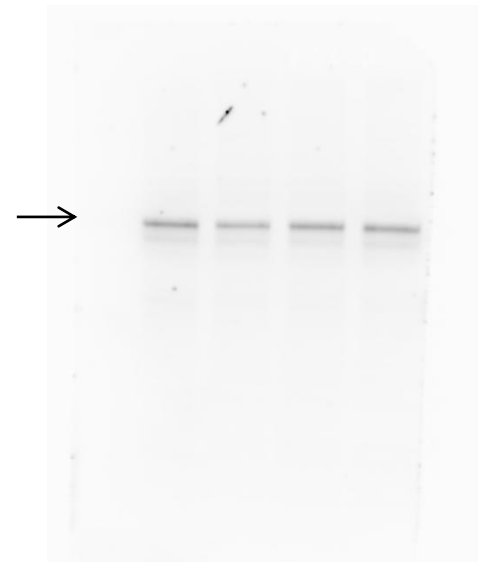

Phospho-p53

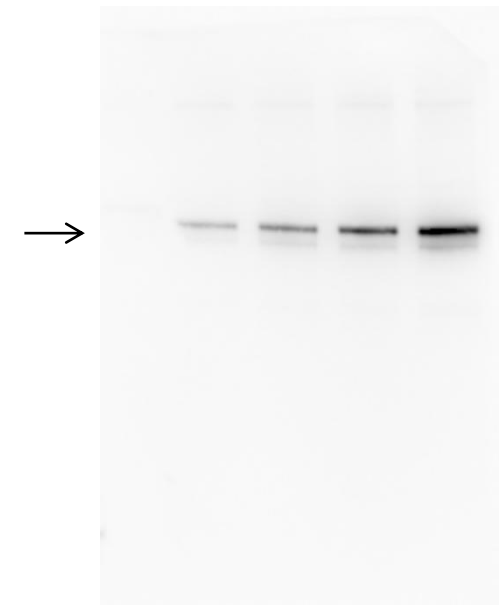

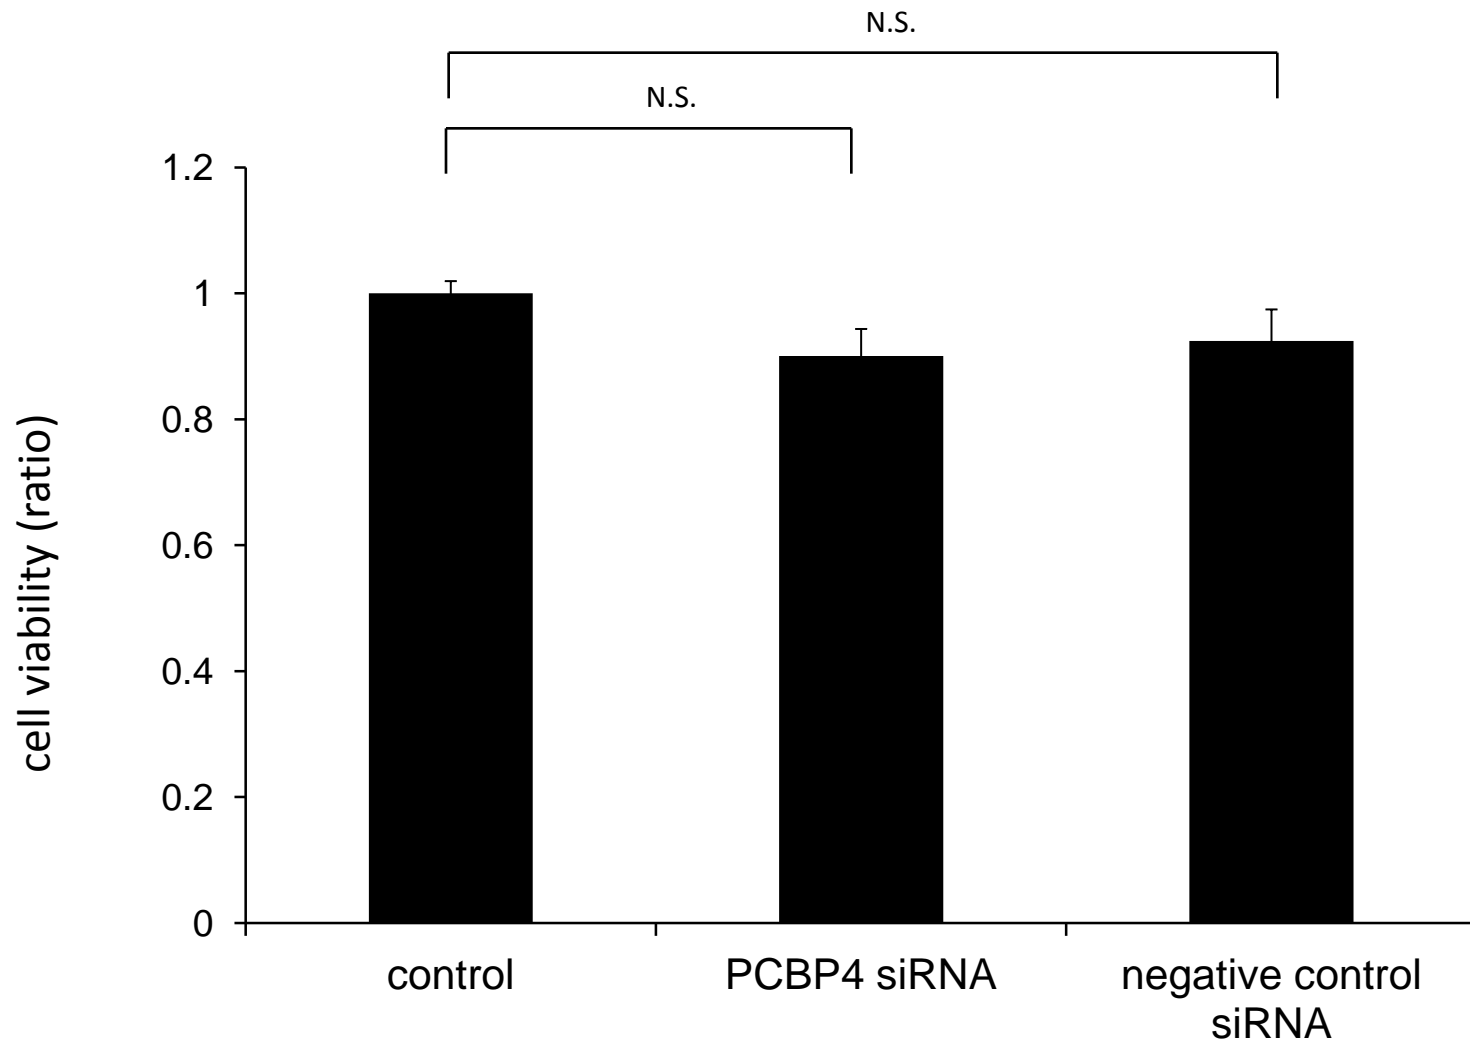

Supplementary Figure S4

Cell viability of IMC-3CR cells 48h after incubation with siRNA for PCBP4 or negative control siRNA. Error bars  $\pm$  s.d.
